# Thermotolerance and virulence of *Aspergillus fumigatus*: role of the fungal nucleolus

R. BHABHRA & D. S. ASKEW

Department of Pathology & Laboratory Medicine, University of Cincinnati College of Medicine, Cincinnati, USA

The ability to thrive at 37°C is characteristic of all human pathogens and has long been suspected to play a role in the pathogenesis of aspergillosis. As a thermotolerant fungus, *Aspergillus fumigatus* is capable of growth at temperatures that approach the upper limit for all eukaryotes, suggesting that the organism has evolved unique mechanisms of stress resistance that may be relevant to its ability to adapt to the stress of growth in the host. High temperature is a strain on many biological systems, particularly those involved in complex macromolecular assemblies such as ribosomes. This review will discuss the relationship between thermotolerance and virulence in pathogenic fungi, emphasizing the link to ribosome biogenesis in *A. fumigatus*. Future work in this area will help determine how rapid growth is accomplished at elevated temperature and may offer new avenues for the development of novel antifungals that disrupt thermotolerant ribosome assembly.

**Keywords** *Aspergillus fumigatus*, CgrA, ribosome biogenesis, thermotolerance, virulence

## Introduction

*Aspergillus fumigatus* is an opportunistic fungal pathogen that has become the leading infectious mould in the immunocompromised patient population [1–3]. The prevalence of *A. fumigatus* conidia in the environment does not completely account for the high frequency of infections with this fungus [4], so it is generally assumed that some aspect of the physiology of *A. fumigatus* allows the organism to be a more efficient opportunistic pathogen than other commonly encountered environmental moulds. Thermotolerance is often cited as a potential virulence factor in this regard. As a major component of the biomass in a self-heating compost pile, *A. fumigatus* is capable of growing rapidly at 37°C and tolerating temperatures above 50°C [5,6]. This is in contrast to most other fungi

which are mesophilic, displaying temperature optima in the range of 25–35°C [7]. The ability to thrive at a high temperature is a unique characteristic shared by the thermotolerant and thermophilic fungi. Although species that fall into either category can thrive at temperatures above 50°C, they are distinguished by the fact that thermotolerant forms maintain growth at temperatures below 20°C, whereas true thermophilic fungi have growth minima at or above 20°C [8]. This arbitrary classification places *A. fumigatus* in the thermotolerant group of fungi. However, since *A. fumigatus* can tolerate 60°C, which is the upper temperature limit for eukaryotic organisms [9], it has likely evolved mechanisms of thermal resistance that are similar to thermophilic fungi. The absence of eukaryotic species from extreme environments, where thermophilic bacteria or archaea can flourish [10], is thought to reflect the inability of any eukaryote to maintain functional organelle membranes at high temperature [9]. Nevertheless, it is interesting to speculate that mechanisms of thermotolerance in *A. fumigatus* may involve temperature-induced expression of stress resistance genes that confer unique virulence properties to the organism, similarly to what has been

Correspondence: D. S. Askew, Ph.D., Department of Pathology & Laboratory Medicine, University of Cincinnati, 231 Bethesda Ave., Cincinnati, OH 45267-0529, USA. Tel: +1 513 558 2395; Fax: +1 513 558 2141; E-mail: David.Askew@uc.edu

reported for some bacterial pathogens [11]. An understanding of how *A. fumigatus* can sustain growth at high temperatures may thus provide important insights that are relevant to the pathogenesis of aspergillosis in humans.

### Thermotolerance and virulence

The ability to grow at 37°C is universal among human pathogens. In bacteria, the transition from a vector or environmental reservoir into a human host is associated with global changes in gene expression that contribute to pathogenesis [11]. A number of these changes are temperature-regulated and include the induction of virulence-related genes, examples of which have been reported in diverse human pathogens such as *Shigella flexneri*, *Bordetella pertussis*, *Yersinia pestis* and *Borrelia burgdorferi* [11]. Some of the gene products encoded by bacterial temperature-regulated genes are considered to be true virulence factors, whereas others are thought to affect pathogenesis indirectly by enhancing overall fitness at higher temperatures [12]. As for bacterial pathogens, the ability to grow at 37°C is a prerequisite for fungal pathogenesis, and failure to grow at 37°C is predictive of attenuated virulence. For example, UV-induced mutants of *Cryptococcus neoformans* that are unable to grow *in vitro* at 37°C are avirulent in mice [13]. Variability in the thermal tolerance of different clinical isolates of *Sporothrix schenckii* also correlates with virulence: isolates obtained from fixed cutaneous lesions grew poorly at 37°C and were unable to multiply in the internal organs of mice, whereas isolates obtained from cases of lymphatic spread grew well at 37°C and were able to cause deep infections in mice [14]. Sensitivity to elevated temperature has also been shown to correlate with strain-specific variations in virulence in the thermally dimorphic fungal pathogen *Histoplasma capsulatum* [15] and, in one thermosensitive strain, is associated with altered expression of the 70 kD heat shock protein (hsp70) [16] and a  $\Delta^9$ -fatty acid desaturase involved in membrane fluidity [17]. Similar correlations have been obtained in *Saccharomyces cerevisiae*, where the ability to grow at temperatures up to 42°C distinguishes clinical isolates from standard laboratory and industrial strains [18–20]. Genetic characterization of such pathogenic *S. cerevisiae* isolates showed that the ability to grow at 42°C is a complex polygenic trait; segregants of hybrids between clinical isolates and laboratory strains showed that various genetic backgrounds contain different sets of alleles which govern thermotolerant growth, although specific loci were not identified in that study owing to the genetic complexity

of the high temperature growth phenotype [20,21]. Such complexity is consistent with the fact that many genes have been reported to affect thermotolerant growth in *S. cerevisiae* [22–27], in addition to diverse physiological conditions such as growth phase, growth medium, colonial organization and cell cycle position [28–32].

Specific genes that have been demonstrated to influence thermotolerance in pathogenic fungi also have diverse functions and often participate in pathways that are linked to the stress response. For example, although the *RAS1* gene is dispensable for normal growth of *C. neoformans* at 24°C, it is required for growth at 37°C [33], emphasizing the importance of *RAS1* signaling to the thermotolerant phenotype. A *ras1* mutant was avirulent in a rabbit model of cryptococcal meningitis, and since this mutant displayed no alterations in well-established virulence factors for *C. neoformans*, such as capsule, melanin and prototrophy, it was concluded that the avirulent phenotype was directly attributable to the temperature-sensitive growth defect [33]. Similar findings of thermosensitive phenotypes in *C. neoformans* have been reported for mutants in calcineurin, a  $\text{Ca}^{2+}$ -calmodulin-regulated protein phosphatase that is the target for the immunosuppressive drugs cyclosporine A and FK506. Mutations in either the catalytic or regulatory subunits of calcineurin blocked 37°C growth *in vitro* and abrogated virulence in animal models [34,35]. The link between thermotolerance and calcineurin is not universal, however, since inactivation of calcineurin in *C. albicans* attenuated virulence without causing thermosensitivity [36].

*Wangiella dermatitidis* is a dematiaceous fungal pathogen that expresses high levels of the class V chitin synthase WdChs5p at high temperatures [37]. Disruption of the WdCHS5 gene produced mutants that grew normally at 25°C but showed cell wall integrity defects at 37°C that were associated with attenuated virulence in a mouse model [37]. This suggests that the cell wall undergoes temperature-dependent modifications that are necessary to support growth *in vivo*. Cell wall stress is known to signal through the mitogen activated protein (MAP) kinase cascade in *S. cerevisiae* [38], so the fact that a *C. neoformans* Mpk1 mutant showed impaired cell integrity in response to high temperature and was attenuated for virulence [39] is consistent with the idea that pathways controlling the cell wall may influence fungal pathogenesis. Remodeling of the fungal membrane may also be necessary for optimal growth at high temperature; disruption of the *C. neoformans* Mga2 transcription factor, which is thought to regulate genes

encoding fatty acid biosynthesis, is induced by 37°C and is required for optimal growth at this temperature [40].

Thermal dimorphism is perhaps the best example of temperature-regulated gene expression that is relevant to fungal pathogenesis. For example, the mycelium-yeast transition in *B. dermatitidis* is induced by shifting mycelia to 37°C, and is associated with the expression of virulence factors such as the surface protein *BAD1* [41]. Temperature-regulated virulence factors have yet to be identified in *A. fumigatus*, although one report of temperature-regulated expression of elastase activity in *A. fumigatus* [42] raises the possibility that networks of temperature-induced genes that could be relevant to pathogenesis may be uncovered by genome-wide expression technology.

Since the ability to grow at high temperature distinguishes *A. fumigatus* from most other environmental moulds, it is conceivable that mechanisms of thermal resistance used by *A. fumigatus* could also be activated as part of the general response to *in vivo* stress and thus contribute to survival in the host. To examine this possibility, a chemical mutagenesis approach was employed to identify *A. fumigatus* mutants that grow normally up to 42°C but fail to grow at 48°C [43]. A total of seven mutants were isolated that met this criterion, one of which was complemented by the introduction of DNA from a cosmid genomic library. Characterization of the complementing DNA fragment identified *THTA*, a gene of unknown function that was required for growth at 48°C when subsequently deleted from wild type *A. fumigatus*. Neither the *thtA* mutant, nor any of the remaining six mutants that failed to grow at 48°C showed a reduction in virulence in a mouse infection model, suggesting that the genes affected by these mutations are dispensable for wild type virulence at 37°C. However, since thermotolerance is likely to be polygenic, the possibility remains that other genes that contribute to high temperature growth could still be involved in pathways that affect virulence.

### Virulence and the translational machinery

Pathogenic fungi must adapt to multiple adverse environmental conditions during the transition to a mammalian host, and meeting these challenges requires an adequate supply of ribosomes so that appropriate defenses can be rapidly mobilized. Indeed, upregulation of the translational apparatus in *Candida albicans* is one of the earliest transcriptional events to occur in response to exposure to human blood [44] suggesting

that an increase in translational capacity is part of the initial adaptive response to *in vivo* growth. Since clinical isolates of *C. albicans* are known to exhibit considerable variability in the number of rDNA repeats [45–47], it is likely that *in vivo* stress continues to exert selective pressure throughout the course of the infection, forcing the organism to modulate rRNA synthesis in proportion to the physiological demand for new protein synthesis. Genome-wide expression profiling of *C. albicans* exposed to itraconazole has also revealed upregulation of the translational machinery, suggesting that increased translation may be part of the general response to environmental stress [48].

The transcriptional profiling of temperature-induced changes in gene expression has been reported for *C. neoformans* using serial analysis of gene expression (SAGE). A comparison of the transcriptomes of strains grown at either 25°C or 37°C *in vitro* showed increased abundance of the translational machinery at 37°C [49], emphasizing the importance of increased translation to meet the demands of high temperature growth. A similar study performed on *C. neoformans* isolated from a rabbit model of cryptococcal meningitis also showed high levels of SAGE tags representative of the translational apparatus [50]. Interestingly, 73% of these translation-related SAGE tags were more abundant in the SAGE library constructed from the rabbit model than the *in vitro* temperature libraries [49], suggesting that the host environment is a more potent inducer of translational capacity than temperature alone. Other screens to identify temperature-regulated screens in *C. neoformans* have identified COX1 (cytochrome c oxidase subunit 1), ICL1 (isocitrate lyase) and AOX1 (alternative oxidase) [51–53]. Mutants in COX1 or ICL1 showed no defects in 37°C growth or virulence, whereas a mutant in AOX1 had attenuated virulence in the absence of a temperature-sensitive growth phenotype, indicating that temperature-regulated genes are not always required for 37°C growth or virulence.

### Ribosome biogenesis and virulence of *A. fumigatus*

Mutations in a number of bacterial heat shock proteins cause ribosome assembly defects at elevated temperature, indicating that chaperone activity facilitates ribosome synthesis at temperatures that are unfavorable to the stability of large macromolecular complexes such as ribosomes [54–57]. In fungi, as in all eukaryotes, ribosome biogenesis takes place predominantly in the nucleolus. The process is highly complex, and much of what is known about the steps involved has been

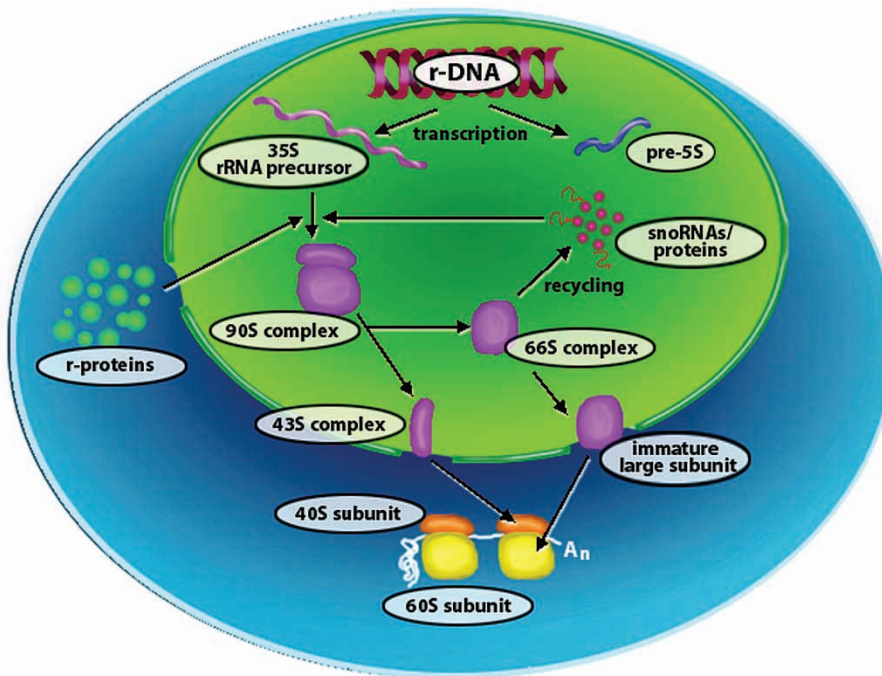

**Fig. 1** Schematic overview of the basic steps involved in ribosome biogenesis in *Saccharomyces cerevisiae*. Each ribosomal DNA (rDNA) repeat unit is transcribed by RNA polymerase I as a single 35S precursor ribosomal RNA (rRNA) that undergoes processing and modification within the nucleolus to generate the mature rRNAs: 18S, 5.8S and 25S rRNA. The fourth rRNA, 5S rRNA, is transcribed independently by RNA polymerase III. Small nucleolar RNAs (snoRNAs) function in the modification and processing of the precursor rRNA. Ribosomal proteins (r-proteins) synthesized on cytoplasmic ribosomes move into the nucleolus where they assemble with rRNA before export and final maturation in the cytoplasm. For clarity, the process is expanded in this schematic to include the whole nucleus whereas in reality it occurs predominantly in the nucleolus. For reviews, see [79–82].

elucidated in *S. cerevisiae* (Fig. 1). Numerous accessory proteins guide the processing and assembly of maturing ribonucleoprotein complexes [58], and their presence in the nucleolus is tightly regulated by the metabolic needs of the cell [59]. The high concentration of proteins in the nucleolus is considered to be the most concentrated mass of proteins per unit volume in the cell, particularly during period of active ribosome assembly [60]. Such a high concentration of macromolecules predisposes proteins to aggregation and denaturation [61]. It is not surprising, therefore, that nucleolar chaperones with functions in the maintenance of nucleolar stability and ribosome biogenesis have also been identified in eukaryotic cells [61–68], and it is interesting to speculate that such proteins in *A. fumigatus* contribute to

thermostable ribosome assembly in the host environment.

Since the number of ribosomes in an ungerminated spore is insufficient to support hyphal growth, new ribosome production is a major synthetic process during the early minutes of germination in filamentous fungi. This process results in a 10-fold increase in the number of ribosomes actively engaged in translation within the first few minutes [69–71]. The initial induction of ribosome synthesis in *A. fumigatus* conidia is thus likely to be one of the first steps to occur during the infection process. In immunocompromised patients, the failure of pulmonary defenses would allow the inhaled conidia to generate sufficient ribosomes to support rapid growth and to disseminate to other

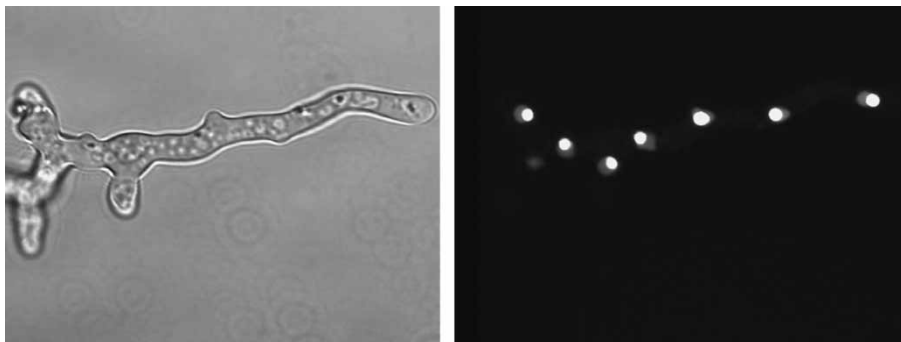

**Fig. 2** Morphology of the *Aspergillus fumigatus* nucleolus revealed by localization of a green fluorescent protein (GFP)-tagged CgrA fusion protein. CgrA-GFP localizes predominantly to the nucleolar compartment, with some presence also in the nucleoplasm. Left panel: differential interference contrast image. Right panel: fluorescent image.



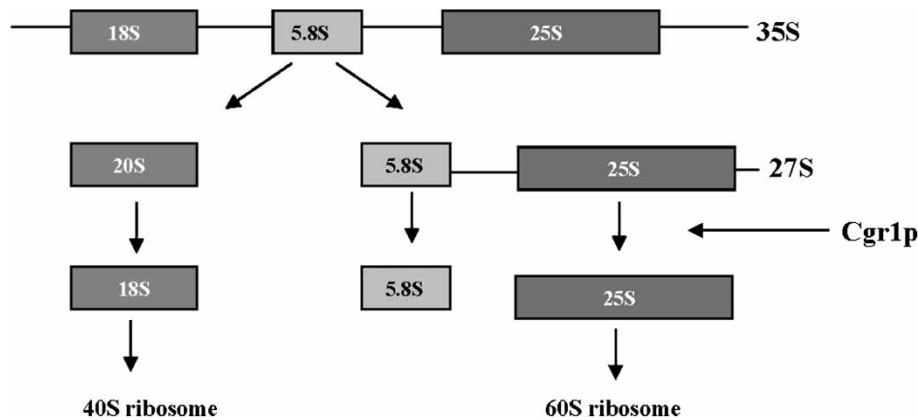

**Fig. 3** A simplified schematic of the major rRNA processing pathways in *Saccharomyces cerevisiae*. The 35S pre-rRNA is processed to form the 18S rRNA (found in the 40S ribosome subunit) and the 25S and 5.8S rRNAs (found in the 60S subunit). Current evidence suggests that Cgr1p has a role in the pathway leading to the synthesis of the mature 25S rRNA (arrow) that is incorporated into the 60S ribosomal subunit [78].

organs, so the ability to block this process at 37°C would have considerable merit as a potential therapeutic strategy. Recent evidence suggests that the synthesis of ribosomes during conidial germination requires the activity of CgrA, a nucleolar protein that provides a link between thermotolerance, ribosome biogenesis and virulence of *A. fumigatus* [72].

The CgrA protein is highly conserved among fungi, with readily identifiable homologs in both filamentous fungi and yeasts. The protein has a distinct nucleolar localization in both yeast [73] and *A. fumigatus* [72], and the ability of the *A. fumigatus* protein to localize to the nucleolus when heterologously expressed in yeast [74] indicates that mechanisms of nucleolar localization are highly conserved between these species. Fig. 2 shows a strain of *A. fumigatus* that expresses a green fluorescent protein (GFP)-tagged CgrA protein, showing the typical morphology of the *A. fumigatus* nucleolus at one edge of the nucleus. Disruption of the *cgrA* gene in *A. fumigatus* produced a mutant that grew normally at 25°C but was unable to achieve the rapid growth rates that are characteristic of *A. fumigatus* at higher temperatures. The growth rate of the  $\Delta cgrA$  strain progressively decreased as the temperature increased above 25°C and conidia were unable to germinate at temperatures above 48°C. By comparison, wild type *A. fumigatus* was able to grow optimally between 37°C and 42°C and retained the ability to grow at 48°C [72].

The  $\Delta cgrA$  mutant was attenuated in an immunosuppressed mouse model of invasive aspergillosis; mice inoculated with the wild type strain died within the first week (median survival 5–6 days), whereas all of the mice infected with the  $\Delta cgrA$  strain survived the first week with over 60% survival to day 14 [72]. Histologic examination of lung tissue showed extensive growth of the wild type strain around bronchioles within two days

post inoculation, but only sporadic germlings were evident in the mice inoculated with the  $\Delta cgrA$  strain. The ability to sustain rapid growth at 37°C is thus an important characteristic of the virulence phenotype for *A. fumigatus*, and is consistent with recent evidence showing that the growth rate of different clinical isolates of *A. fumigatus* at 37°C correlates with virulence in animal models [75]. When the virulence of the  $\Delta cgrA$  mutant was compared in *Drosophila melanogaster*, an invertebrate infection host that can be maintained at 25°C [76,77], the  $\Delta cgrA$  mutant was comparable in virulence to wild type [72]. Since the  $\Delta cgrA$  mutant grows at the same rate as wild type at 25°C, the attenuated virulence of the  $\Delta cgrA$  mutant in mice is most likely due to impaired growth at mammalian body temperature.

The ability of *A. fumigatus cgrA* to complement a yeast *cgr1* mutant indicates that CgrA and Cgr1 are orthologous proteins with overlapping functions [74]. To gain insight into this function, yeast *cgr1* mutants were analysed for defects in ribosome biogenesis. The Cgr1 protein was shown to be necessary for pre-rRNA processing and 60S ribosomal subunit assembly (Fig. 3), thereby establishing a role for this protein in ribosome biogenesis [78]. Further understanding of CgrA and the mechanism by which it contributes to ribosome synthesis at elevated temperature may offer new insights into pathways of thermotolerant ribosome assembly that might be amenable to therapeutic targeting.

## References

- Latge JP. *Aspergillus fumigatus* and aspergillosis. *Clin Microbiol Rev* 1999; **12**: 310–350.
- Denning DW. Invasive aspergillosis. *Clin Infect Dis* 1998; **26**: 781–803.

- 3 Lin SJ, Schranz J, Teutsch SM. Aspergillosis case-fatality rate: systematic review of the literature. *Clin Infect Dis* 2001; **32**: 358–366.
- 4 Hospenthal DR, Kwon-Chung KJ, Bennett JE. Concentrations of airborne *Aspergillus* compared to the incidence of invasive aspergillosis: lack of correlation. *Med Mycol* 1998; **36**: 165–168.
- 5 Beffa T, Staib F, Lott Fischer J, *et al.* Mycological control and surveillance of biological waste and compost. *Med Mycol* 1998; **36**(Suppl 1): 137–145.
- 6 St-Germain G, Summerbell R. *Identifying filamentous fungi: A clinical laboratory handbook*. Belmont, CA: Star Publishing Co., 1996.
- 7 Cooney D, Emerson R. *Thermophilic fungi. An account of their biology, activities and classification*. San Francisco: W.H. Freeman & Co., 1964.
- 8 Maheshwari R, Bharadwaj G, Bhat MK. Thermophilic fungi: their physiology and enzymes. *Microbiol Mol Biol Rev* 2000; **64**: 461–488.
- 9 Tansey MR, Brock TD. The upper temperature limit for eukaryotic organisms. *Proc Natl Acad Sci USA* 1972; **69**: 2426–2428.
- 10 Madigan MT, Oren A. Thermophilic and halophilic extremophiles. *Curr Opin Microbiol* 1999; **2**: 265–269.
- 11 Konkel ME, Tilly K. Temperature-regulated expression of bacterial virulence genes. *Microbes Infect* 2000; **2**: 157–166.
- 12 Gophna U, Ron EZ. Virulence and the heat shock response. *Int J Med Microbiol* 2003; **292**: 453–461.
- 13 Kwon-Chung KJ, Polacheck I, Popkin TJ. Melanin-lacking mutants of *Cryptococcus neoformans* and their virulence for mice. *J Bacteriol* 1982; **150**: 1414–1421.
- 14 Kwon-Chung KJ. Comparison of isolates of *Sporothrix schenckii* obtained from fixed cutaneous lesions with isolates from other types of lesions. *J Infect Dis* 1979; **139**: 424–431.
- 15 Medoff G, Maresca B, Lambowitz AM, *et al.* Correlation between pathogenicity and temperature sensitivity in different strains of *Histoplasma capsulatum*. *J Clin Invest* 1986; **78**: 1638–1647.
- 16 Caruso M, Sacco M, Medoff G, Maresca B. Heat shock 70 gene is differentially expressed in *Histoplasma capsulatum* strains with different levels of thermotolerance and pathogenicity. *Mol Microbiol* 1987; **1**: 151–158.
- 17 Gargano S, Di Lallo G, Kobayashi GS, Maresca B. A temperature-sensitive strain of *Histoplasma capsulatum* has an altered  $\Delta 9$ -fatty acid desaturase gene. *Lipids* 1995; **30**: 899–906.
- 18 McCusker JH, Clemons KV, Stevens DA, Davis RW. *Saccharomyces cerevisiae* virulence phenotype as determined with CD-1 mice is associated with the ability to grow at 42 degrees C and form pseudohyphae. *Infect Immun* 1994; **62**: 5447–5455.
- 19 Clemons KV, McCusker JH, Davis RW, Stevens DA. Comparative pathogenesis of clinical and nonclinical isolates of *Saccharomyces cerevisiae*. *J Infect Dis* 1994; **169**: 859–867.
- 20 McCusker JH, Clemons KV, Stevens DA, Davis RW. Genetic characterization of pathogenic *Saccharomyces cerevisiae* isolates. *Genetics* 1994; **136**: 1261–1269.
- 21 Kamada Y, Jung US, Piotrowski J, Levin DE. The protein kinase C-activated MAP kinase pathway of *Saccharomyces cerevisiae* mediates a novel aspect of the heat shock response. *Genes Dev* 1995; **9**: 1559–1571.
- 22 Lindquist S, Kim G. Heat-shock protein 104 expression is sufficient for thermotolerance in yeast. *Proc Natl Acad Sci USA* 1996; **93**: 5301–5306.
- 23 Ohkuni K, Okuda A, Kikuchi A. Yeast Nap1-binding protein Nbp2p is required for mitotic growth at high temperatures and for cell wall integrity. *Genetics* 2003; **165**: 517–529.
- 24 Ufano S, del Rey F, Vazquez de Aldana CR. Swm1p, a subunit of the APC/cyclosome, is required to maintain cell wall integrity during growth at high temperature in *Saccharomyces cerevisiae*. *FEMS Microbiol Lett* 2004; **234**: 371–378.
- 25 Schmitt M, Neupert W, Langer T. The molecular chaperone Hsp78 confers compartment-specific thermotolerance to mitochondria. *J Cell Biol* 1996; **134**: 1375–1386.
- 26 Lee SM, Park JW. Thermosensitive phenotype of yeast mutant lacking thioredoxin peroxidase. *Arch Biochem Biophys* 1998; **359**: 99–106.
- 27 Bialek-Wyrzykowska U, Bauer BE, Wagner W, *et al.* Low levels of Ypt protein prenylation cause vesicle polarization defects and thermosensitive growth that can be suppressed by genes involved in cell wall maintenance. *Mol Microbiol* 2000; **35**: 1295–1311.
- 28 Werner-Washburne M, Braun E, Johnston GC, Singer RA. Stationary phase in the yeast *Saccharomyces cerevisiae*. *Microbiol Rev* 1993; **57**: 383–401.
- 29 Sherman F. The effects of elevated temperatures on yeast. I. Nutrient requirements for growth at elevated temperatures. *J Cell Comp Physiol* 1959; **54**: 29–35.
- 30 Matmati N, Morpurgo G, Babudri N, Marini A. The influence of colonial organization on thermotolerance and thermoresistance in *Saccharomyces cerevisiae*. *J Basic Microbiol* 2002; **42**: 345–54.
- 31 Piper PW. Molecular events associated with acquisition of heat tolerance by the yeast *Saccharomyces cerevisiae*. *FEMS Microbiol Rev* 1993; **11**: 339–355.
- 32 Plesset J, Ludwig JR, Cox BS, McLaughlin CS. Effect of cell cycle position on thermotolerance in *Saccharomyces cerevisiae*. *J Bacteriol* 1987; **169**: 779–784.
- 33 Alsbaugh JA, Cavallo LM, Perfect JR, Heitman J. RAS1 regulates filamentation, mating and growth at high temperature of *Cryptococcus neoformans*. *Mol Microbiol* 2000; **36**: 352–365.
- 34 Fox DS, Cruz MC, Sia RA, *et al.* Calcineurin regulatory subunit is essential for virulence and mediates interactions with FKBP12-FK506 in *Cryptococcus neoformans*. *Mol Microbiol* 2001; **39**: 835–849.
- 35 Odom A, Muir S, Lim E, *et al.* Calcineurin is required for virulence of *Cryptococcus neoformans*. *Embo J* 1997; **16**: 2576–2589.
- 36 Bader T, Bodendorfer B, Schroppel K, Morschhauser J. Calcineurin is essential for virulence in *Candida albicans*. *Infect Immun* 2003; **71**: 5344–5354.
- 37 Liu H, Kauffman S, Becker JM, Szaniszló PJ. *Wangiella (Exophiala) dermatitidis* WdChs5p, a class V chitin synthase, is essential for sustained cell growth at temperature of infection. *Eukaryot Cell* 2004; **3**: 40–51.
- 38 Posas F, Takekawa M, Saito H. Signal transduction by MAP kinase cascades in budding yeast. *Curr Opin Microbiol* 1998; **1**: 175–182.
- 39 Kraus PR, Fox DS, Cox GM, Heitman J. The *Cryptococcus neoformans* MAP kinase Mpk1 regulates cell integrity in response to antifungal drugs and loss of calcineurin function. *Mol Microbiol* 2003; **48**: 1377–1387.
- 40 Kraus PR, Boily M-J, Giles SS, *et al.* Identification of *Cryptococcus neoformans* temperature-regulated genes by use of a genomic-DNA microarray. *Eukaryot Cell* 2004; in press.
- 41 Rooney PJ, Sullivan TD, Klein BS. Selective expression of the virulence factor BAD1 upon morphogenesis to the pathogenic yeast form of *Blastomyces dermatitidis*: evidence for transcrip-

- tional regulation by a conserved mechanism. *Mol Microbiol* 2001; **39**: 875–889.
- 42 Denning DW, Elliott J, Keaney M. Temperature-dependent expression of elastase in *Aspergillus* species. *J Med Vet Mycol* 1993; **31**: 455–458.
  - 43 Chang YC, Tsai HF, Karos M, Kwon-Chung KJ. *THTA*, a thermotolerance gene of *Aspergillus fumigatus*. *Fungal Genet Biol* 2004; **41**: 888–896.
  - 44 Fradin C, Kretschmar M, Nichterlein T, *et al.* Stage-specific gene expression of *Candida albicans* in human blood. *Mol Microbiol* 2003; **47**: 1523–1543.
  - 45 Huber D, Rustchenko E. Large circular and linear rDNA plasmids in *Candida albicans*. *Yeast* 2001; **18**: 261–272.
  - 46 Rustchenko EP, Curran TM, Sherman F. Variations in the number of ribosomal DNA units in morphological mutants and normal strains of *Candida albicans* and in normal strains of *Saccharomyces cerevisiae*. *J Bacteriol* 1993; **175**: 7189–7199.
  - 47 Rustchenko EP, Sherman F. Physical constitution of ribosomal genes in common strains of *Saccharomyces cerevisiae*. *Yeast* 1994; **10**: 1157–1171.
  - 48 De Backer MD, Ilyina T, Ma XJ, *et al.* Genomic profiling of the response of *Candida albicans* to itraconazole treatment using a DNA microarray. *Antimicrob Agents Chemother* 2001; **45**: 1660–1670.
  - 49 Steen BR, Lian T, Zuyderduyn S, *et al.* Temperature-regulated transcription in the pathogenic fungus *Cryptococcus neoformans*. *Genome Res* 2002; **12**: 1386–4000.
  - 50 Steen BR, Zuyderduyn S, Toffaletti DL, *et al.* *Cryptococcus neoformans* gene expression during experimental cryptococcal meningitis. *Eukaryot Cell* 2003; **2**: 1336–1349.
  - 51 Toffaletti DL, Del Poeta M, Rude TH, Dietrich F, Perfect JR. Regulation of cytochrome c oxidase subunit 1 (COX1) expression in *Cryptococcus neoformans* by temperature and host environment. *Microbiology* 2003; **149**: 1041–1049.
  - 52 Rude TH, Toffaletti DL, Cox GM, Perfect JR. Relationship of the glyoxylate pathway to the pathogenesis of *Cryptococcus neoformans*. *Infect Immun* 2002; **70**: 5684–5694.
  - 53 Akhter S, McDade HC, Gorlach JM, *et al.* Role of alternative oxidase gene in pathogenesis of *Cryptococcus neoformans*. *Infect Immun* 2003; **71**: 5794–5802.
  - 54 Bugl H, Fauman EB, Staker BL, *et al.* RNA methylation under heat shock control. *Mol Cell* 2000; **6**: 349–360.
  - 55 Alix JH, Guerin MF. Mutant DnaK chaperones cause ribosome assembly defects in *Escherichia coli*. *Proc Natl Acad Sci USA* 1993; **90**: 9725–9729.
  - 56 El Hage A, Sbai M, Alix JH. The chaperonin GroEL and other heat-shock proteins, besides DnaK, participate in ribosome biogenesis in *Escherichia coli*. *Mol Gen Genet* 2001; **264**: 796–808.
  - 57 Hage AE, Alix JH. Authentic precursors to ribosomal subunits accumulate in *Escherichia coli* in the absence of functional DnaK chaperone. *Mol Microbiol* 2004; **51**: 189–201.
  - 58 Saveanu C, Namane A, Gleizes PE, *et al.* Sequential protein association with nascent 60S ribosomal particles. *Mol Cell Biol* 2003; **23**: 4449–4460.
  - 59 Andersen JS, Lyon CE, Fox AH, *et al.* Directed proteomic analysis of the human nucleolus. *Curr Biol* 2002; **12**: 1–11.
  - 60 Pederson T, Politz JC. The nucleolus and the four ribonucleoproteins of translation. *J Cell Biol* 2000; **148**: 1091–1095.
  - 61 Szebeni A, Hingorani K, Negi S, Olson MO. Role of protein kinase CK2 phosphorylation in the molecular chaperone activity of nucleolar protein b23. *J Biol Chem* 2003; **278**: 9107–9015.
  - 62 Nollen EA, Salomons FA, Brunsting JF, *et al.* Dynamic changes in the localization of thermally unfolded nuclear proteins associated with chaperone-dependent protection. *Proc Natl Acad Sci USA* 2001; **98**: 12038–12043.
  - 63 Pelham HR. Hsp70 accelerates the recovery of nucleolar morphology after heat shock. *Embo J* 1984; **3**: 3095–3100.
  - 64 Chatterjee TK, Fisher RA. Mild heat and proteotoxic stress promote unique subcellular trafficking and nucleolar accumulation of RGS6 and other RGS proteins. Role of the RGS domain in stress-induced trafficking of RGS proteins. *J Biol Chem* 2003; **278**: 30272–30282.
  - 65 Welch WJ, Suhan JP. Cellular and biochemical events in mammalian cells during and after recovery from physiological stress. *J Cell Biol* 1986; **103**: 2035–2052.
  - 66 Okuwaki M, Matsumoto K, Tsujimoto M, Nagata K. Function of nucleophosmin/B23, a nucleolar acidic protein, as a histone chaperone. *FEBS Lett* 2001; **506**: 272–276.
  - 67 Hingorani K, Szebeni A, Olson MO. Mapping the functional domains of nucleolar protein B23. *J Biol Chem* 2000; **275**: 24451–24457.
  - 68 Szebeni A, Olson MO. Nucleolar protein B23 has molecular chaperone activities. *Protein Sci* 1999; **8**: 905–912.
  - 69 Mirkes PE. Polysomes, ribonucleic acid, and protein synthesis during germination of *Neurospora crassa* conidia. *J Bacteriol* 1974; **117**: 196–202.
  - 70 Brogden KA, Phillips M, Thurston JR, Richard JL. Electron microscopic examination of ribosome preparations from germinated spores of *Aspergillus fumigatus*. *Mycopathologia* 1984; **86**: 59–64.
  - 71 Winther MD SL. RNA synthesis during the germination of conidia of *Aspergillus nidulans*. *Microbios* 1981; **30**: 153–162.
  - 72 Bhabhra R, Miley MD, Mylonakis E, *et al.* Disruption of the *Aspergillus fumigatus* gene encoding nucleolar protein CgrA impairs thermotolerant growth and reduces virulence. *Infect Immun* 2004; **72**: 4731–4740.
  - 73 Sun J, McFarland M, Boettner D, *et al.* Cgr1p, a novel nucleolar protein encoded by *Saccharomyces cerevisiae* orf YGL0292w. *Curr Microbiol* 2001; **42**: 65–69.
  - 74 Boettner, Huebner N, Rhodes JC, Askew DS. Molecular cloning of *Aspergillus fumigatus* CgrA, the ortholog of a conserved fungal nucleolar protein. *Med Mycol* 2001; **39**: 517–521.
  - 75 Paisley D, Robson GD, Denning DW. Correlation between *in vitro* growth rate and *in vivo* virulence in *Aspergillus fumigatus*. *Med Mycol* 2005; in press.
  - 76 Apidianakis Y, Rahme LG, Heitman J, *et al.* Challenge of *Drosophila melanogaster* with *Cryptococcus neoformans* and role of the innate immune response. *Eukaryot Cell* 2004; **3**: 413–419.
  - 77 Lemaitre B, Nicolas E, Michaut L, Reichhart JM, Hoffmann JA. The dorsoventral regulatory gene cassette spatzle/Toll/cactus controls the potent antifungal response in *Drosophila* adults. *Cell* 1996; **86**: 973–983.
  - 78 Moy TI, Boettner D, Rhodes JC, Silver PA, Askew DS. Identification of a role for *Saccharomyces cerevisiae* Cgr1p in pre-rRNA processing and 60S ribosome subunit synthesis. *Microbiology* 2002; **148**: 1081–1090.
  - 79 Planta RJ. Regulation of ribosome synthesis in yeast. *Yeast* 1997; **13**: 1505–1518.
  - 80 Warner JR. The economics of ribosome biosynthesis in yeast. *Trends Biochem Sci* 1999; **24**: 437–440.
  - 81 Fromont-Racine M, Senger B, Saveanu C, Fasiolo F. Ribosome assembly in eukaryotes. *Gene* 2003; **313**: 17–42.
  - 82 Granneman S, Baserga SJ. Ribosome biogenesis: of knobs and RNA processing. *Exp Cell Res* 2004; **296**: 43–50.
